# Supplementary material
Source: publisher site journal article supplement (https://www.spandidos-publications.com/5181/downloadSupplementary)

Figure S1. Transfection efficiency of HNF1A and 53BP1 vectors and siRNA in pancreatic ductal adenocarcinoma cell lines *in vitro*. Transfection efficiency of HNF1A overexpression in Panc-1 and MiaPaCa-2 cells was quantified by (A) RT-qPCR and (B) western blotting. Transfection efficiency of HNF1A knockdown in Panc-1 and MiaPaCa-2 cells was quantified by (C) RT-qPCR and (D) western blotting. Transfection efficiency of 53BP1 overexpression in Panc-1 and MiaPaCa-2 cells was quantified by (E) RT-qPCR and (F) western blotting. The results are expressed as the mean  $\pm$  SD. \*\*\* $P$ <0.001. 53BP1, p53-binding protein 1; HNF1A, hepatocyte nuclear factor 1 homeobox A; NC, negative control; RT-qPCR, reverse transcription-quantitative PCR; si, small interfering.

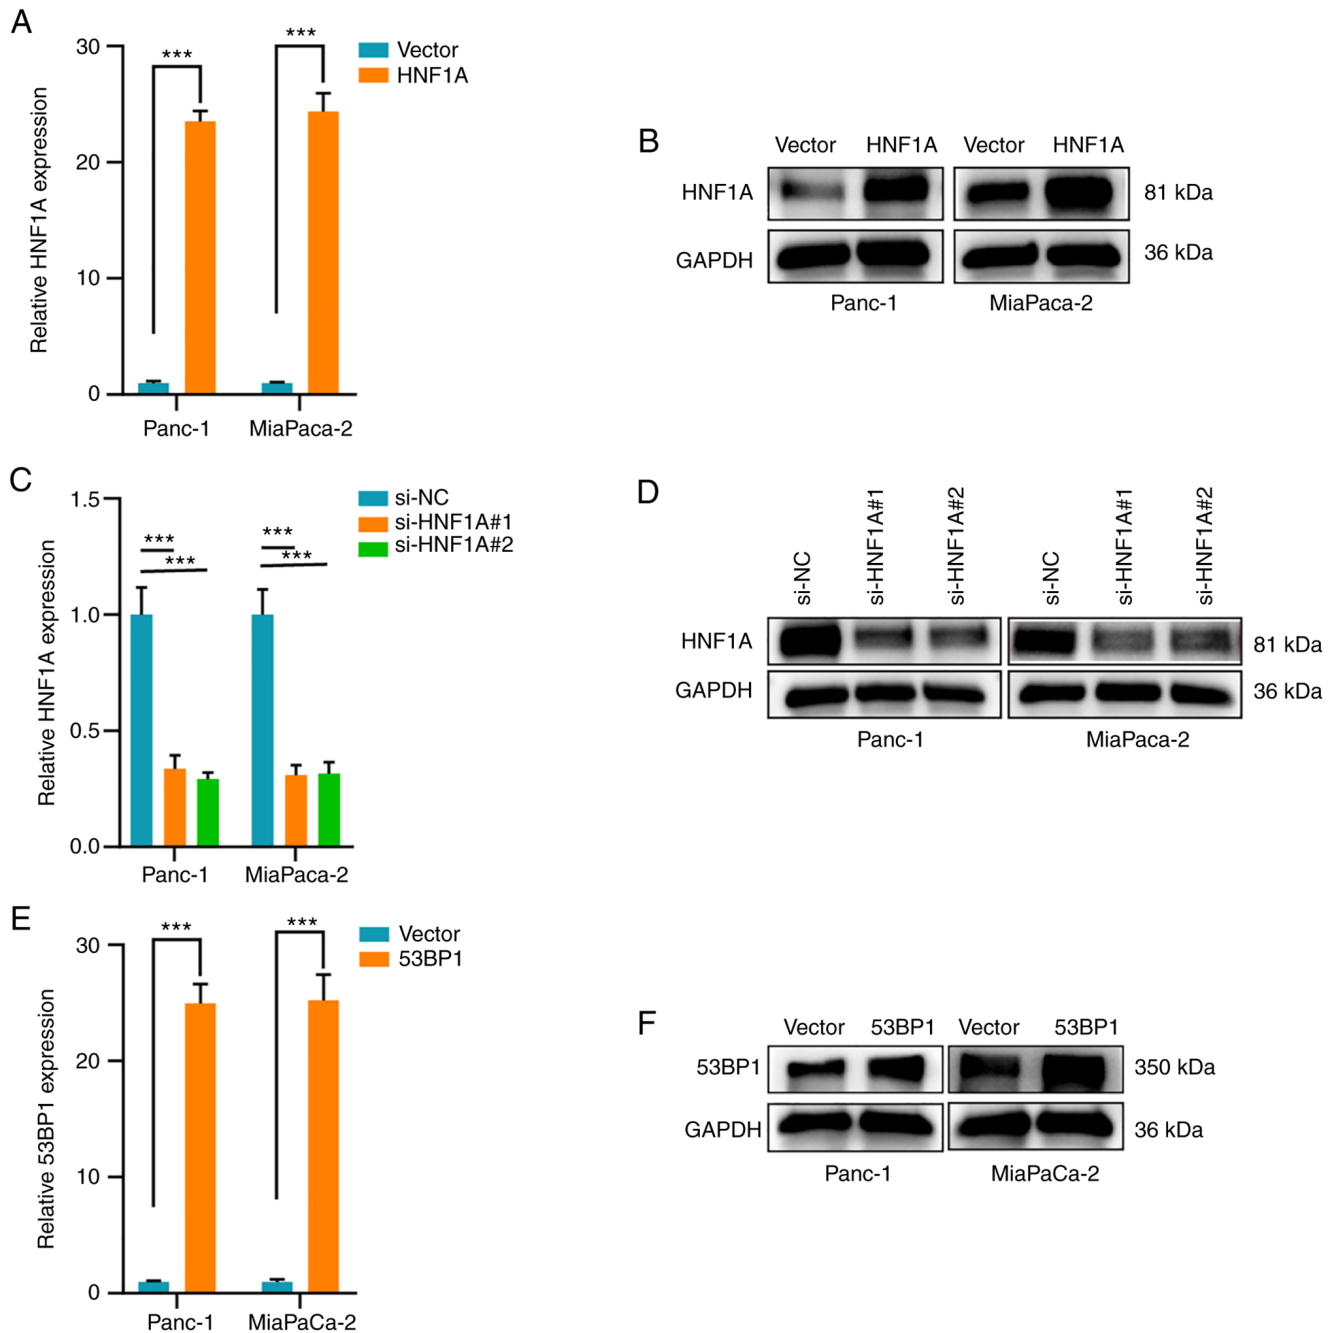

Figure S2. HNF1A mediates cisplatin resistance in PDAC cell lines *in vitro*. (A) Proliferation of Panc-1 and MiaPaCa-2 cells after HNF1A overexpression under cisplatin treatment (5  $\mu$ M), as determined by Cell Counting Kit-8 assays. \* $P$ <0.05, \*\* $P$ <0.01 and \*\*\* $P$ <0.001 vs. Vector. (B) Proliferation of Panc-1 and MiaPaCa-2 cells after HNF1A knockdown under cisplatin treatment (5  $\mu$ M), as determined by Cell Counting Kit-8 assays. \* $P$ <0.05 and \*\* $P$ <0.01 vs. si-NC. Representative images of the colony formation of Panc-1 and MiaPaCa-2 cells after (C) HNF1A overexpression or (D) HNF1A knockdown under cisplatin treatment (5  $\mu$ M). Sphere formation assays showing Panc-1 and MiaPaCa-2 cell proliferation after (E) HNF1A overexpression or (F) HNF1A knockdown under cisplatin treatment (5  $\mu$ M). Scale bars, 50  $\mu$ m. The results are expressed as the mean  $\pm$  SD. \* $P$ <0.05, \*\* $P$ <0.01, \*\*\* $P$ <0.001. HNF1A, hepatocyte nuclear factor 1 homeobox A; NC, negative control; si, small interfering.

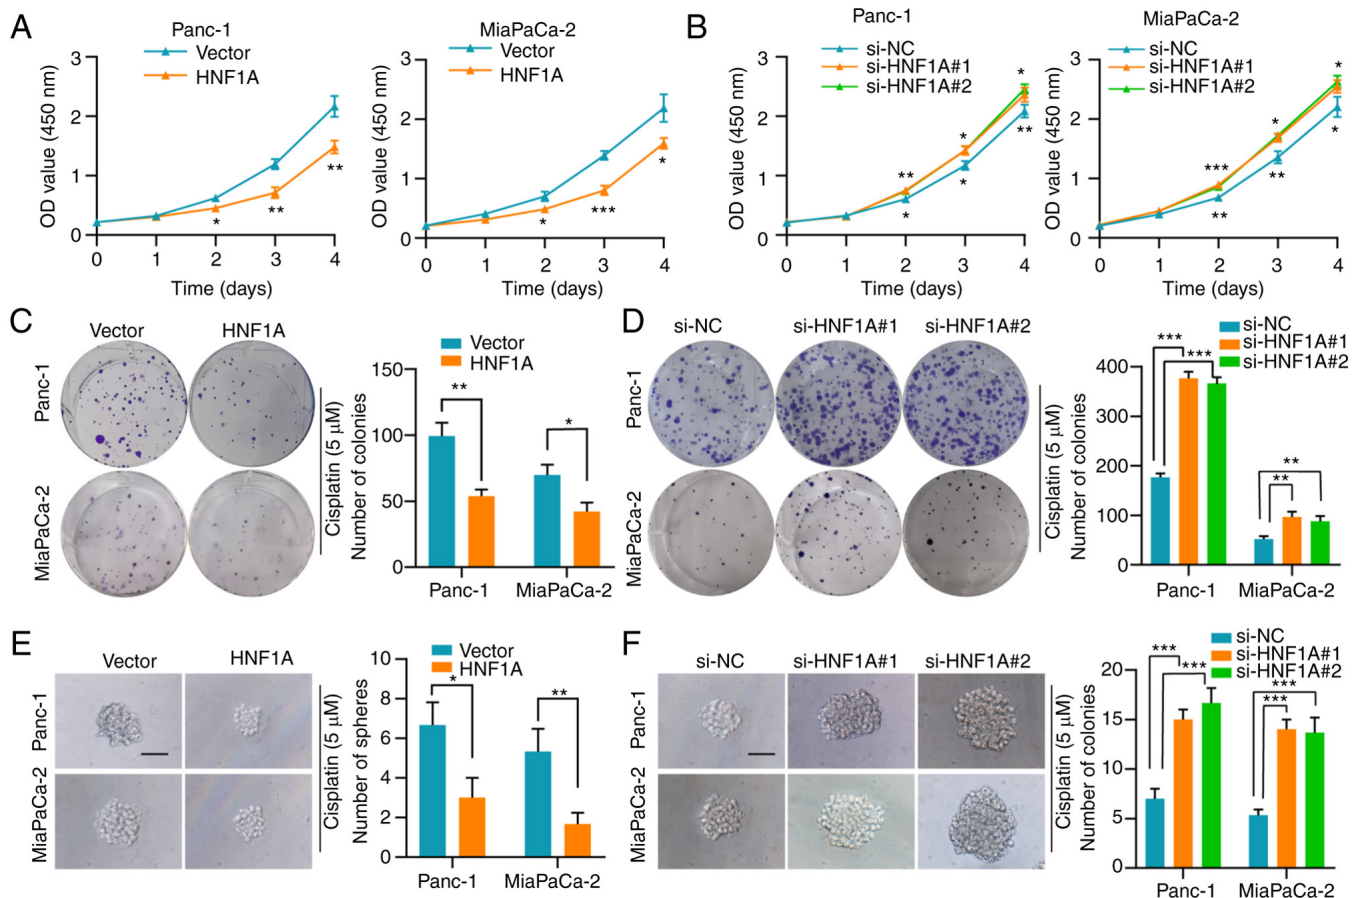

Figure S3. HNF1A mediates carboplatin resistance in PDAC cell lines *in vitro*. (A) Proliferation of Panc-1 and MiaPaCa-2 cells after HNF1A overexpression under carboplatin treatment (4  $\mu$ M), as determined by Cell Counting Kit-8 assays. \* $P$ <0.05, \*\* $P$ <0.01 and \*\*\* $P$ <0.001 vs. Vector. (B) Proliferation of Panc-1 and MiaPaCa-2 cells after HNF1A knockdown under carboplatin treatment (4  $\mu$ M), as determined by Cell Counting Kit-8 assays. \* $P$ <0.05 and \*\* $P$ <0.01 vs. si-NC. Representative images of the colony formation of Panc-1 and MiaPaCa-2 cells after (C) HNF1A overexpression or (D) HNF1A knockdown under carboplatin treatment (4  $\mu$ M). Sphere formation assays showing Panc-1 and MiaPaCa-2 cell proliferation after (E) HNF1A overexpression or (F) HNF1A knockdown under carboplatin treatment (4  $\mu$ M). Scale bars, 50  $\mu$ m. The results are expressed as the mean  $\pm$  SD. \* $P$ <0.05, \*\* $P$ <0.01, \*\*\* $P$ <0.001. HNF1A, hepatocyte nuclear factor 1 homeobox A; NC, negative control; si, small interfering.

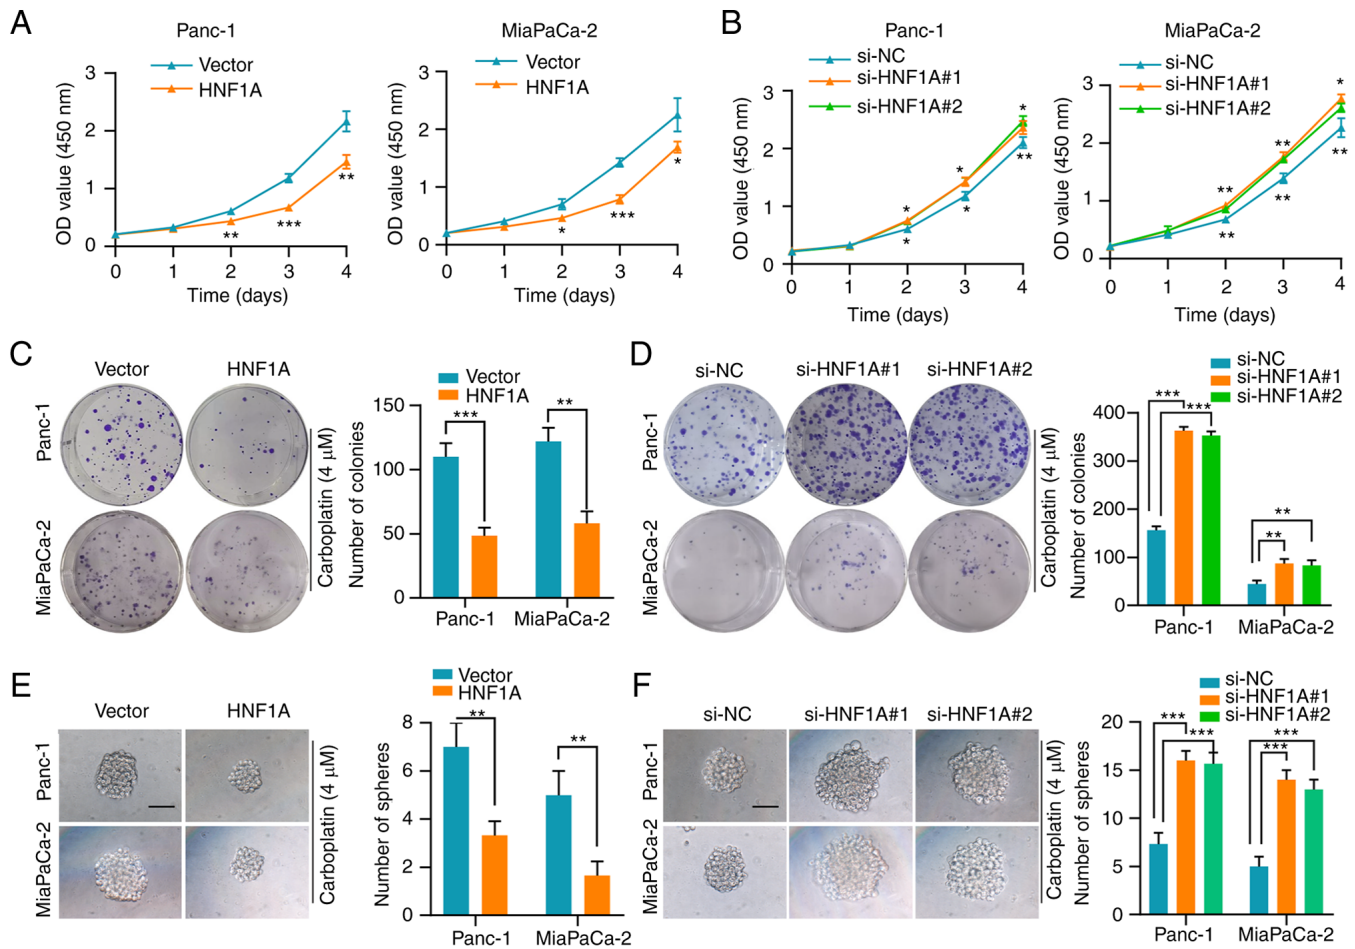

Figure S4. Oxaliplatin-induced apoptosis in PDAC cell lines *in vitro*. Oxaliplatin (5  $\mu$ M)-induced apoptosis of Panc-1 and MiaPaCa-2 cells was examined through flow cytometry after (A) HNF1A overexpression or (B) HNF1A knockdown. HNF1A, hepatocyte nuclear factor 1 homeobox A; NC, negative control; si, small interfering.

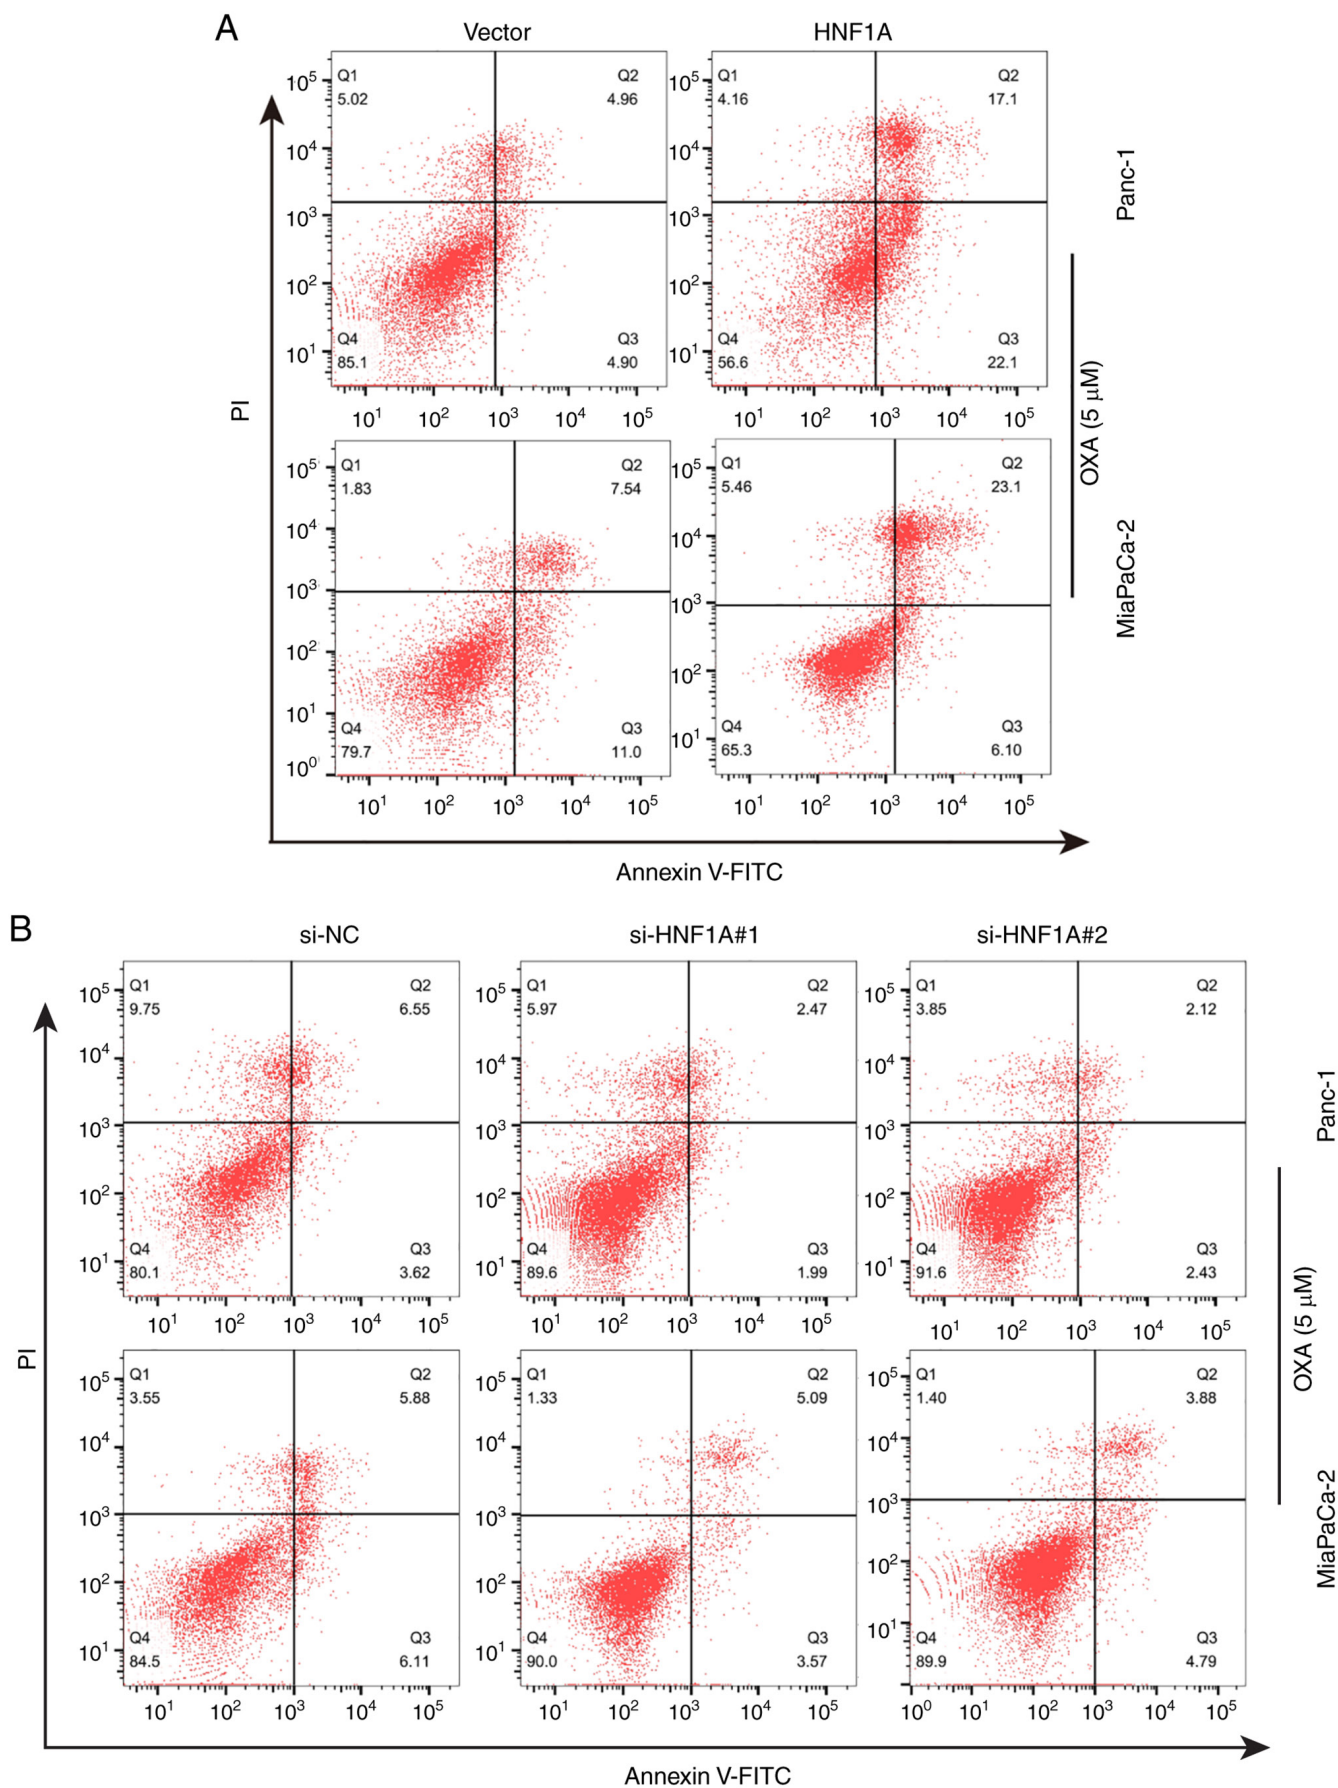

Figure S5. HR/NHEJ-mediated DNA repair in PDAC cell lines *in vitro*. (A) Panc-1 and MiaPaCa-2 cell HR-mediated DNA repair efficiency was detected using the pDR-GFP reporter assay after HNF1A overexpression. (B) Panc-1 and MiaPaCa-2 cell NHEJ-mediated DNA repair efficiency was detected using the pimEJ5-GFP reporter assay after HNF1A overexpression. (C) Panc-1 and MiaPaCa-2 cell HR-mediated DNA repair efficiency was detected using the pDR-GFP reporter assay after HNF1A knockdown. (D) Panc-1 and MiaPaCa-2 cell NHEJ-mediated DNA repair efficiency was detected using the pimEJ5-GFP reporter assay after HNF1A knockdown. HNF1A, hepatocyte nuclear factor 1 homeobox A; HR, homologous recombination; NC, negative control; NHEJ, nonhomologous end joining; si, small interfering.

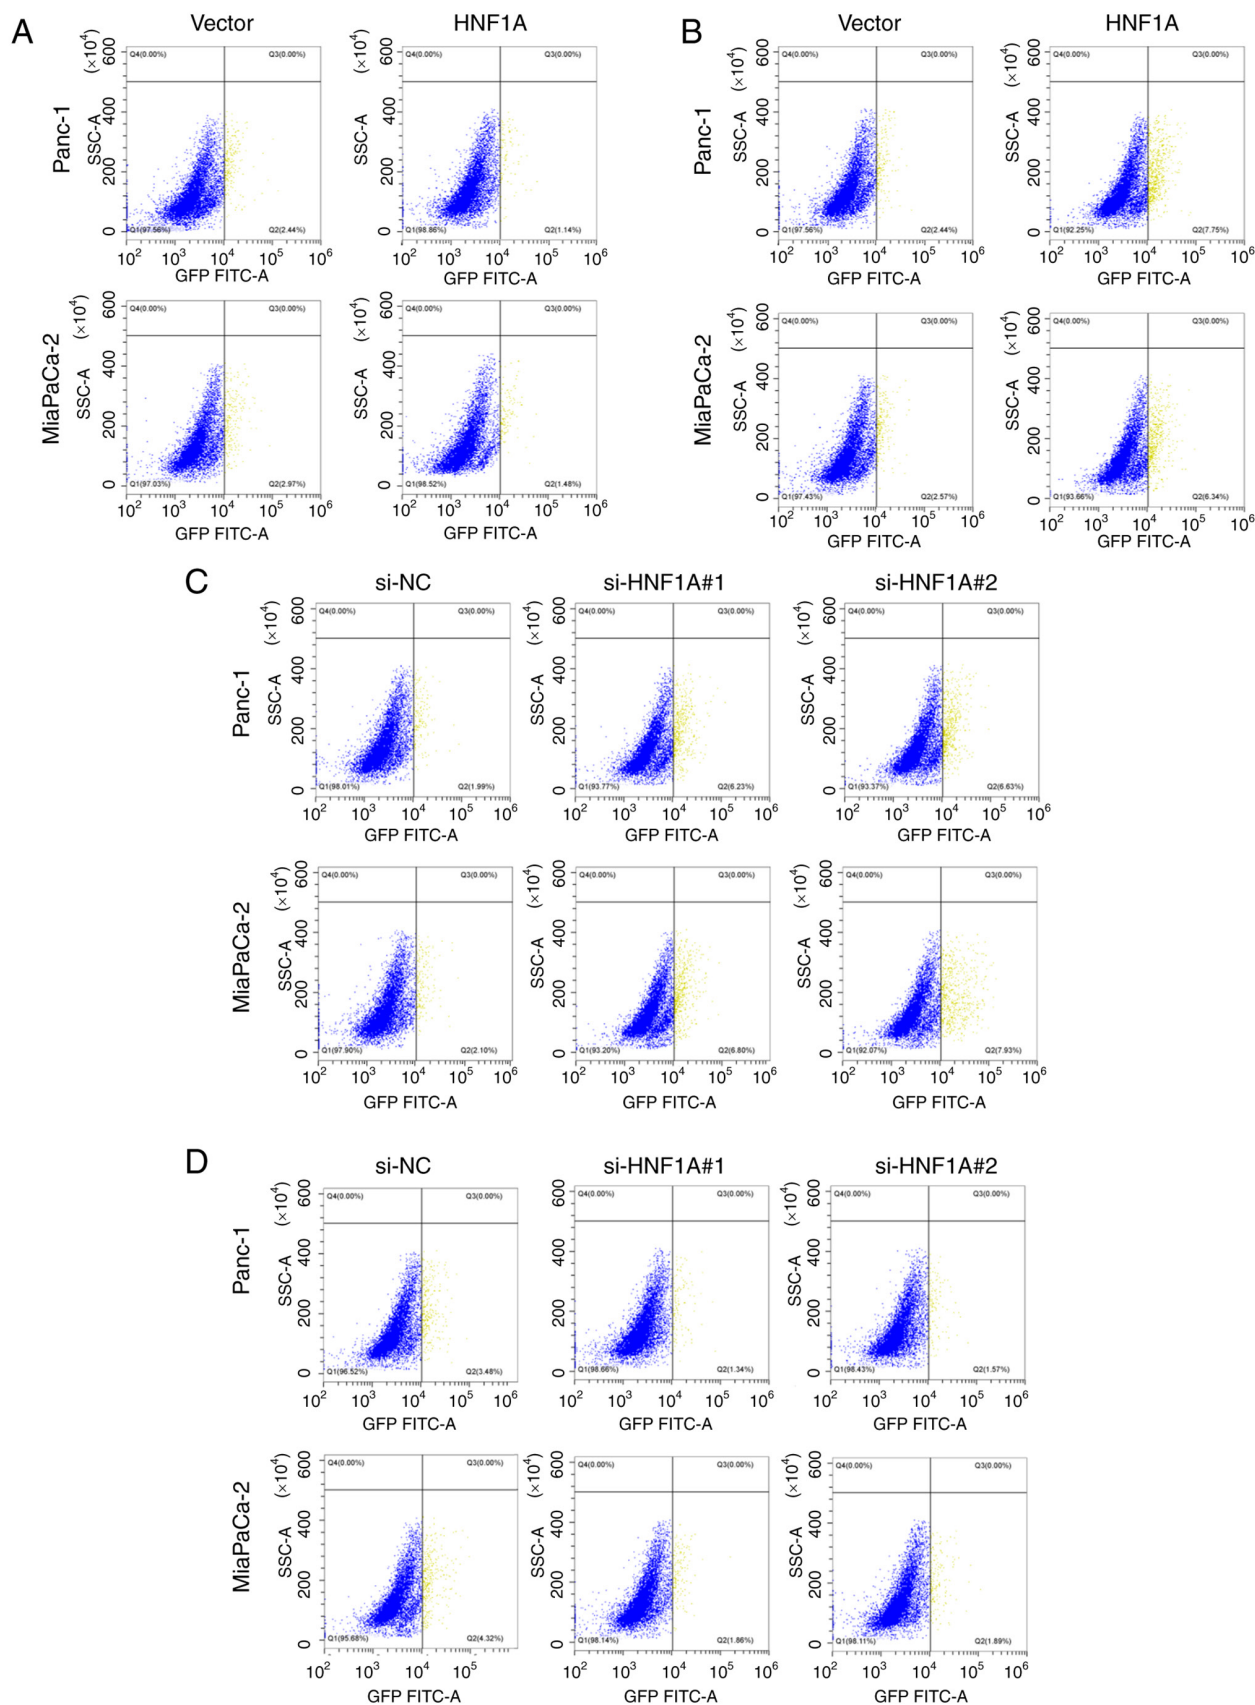

Figure S6. Oxaliplatin-induced apoptosis in PDAC cell lines *in vitro*. Oxaliplatin-induced apoptosis of Panc-1 and MiaPaCa-2 cells was examined through flow cytometry. 53BP1, p53-binding protein 1; HNF1A, hepatocyte nuclear factor 1 homeobox A; NC, negative control; si, small interfering.

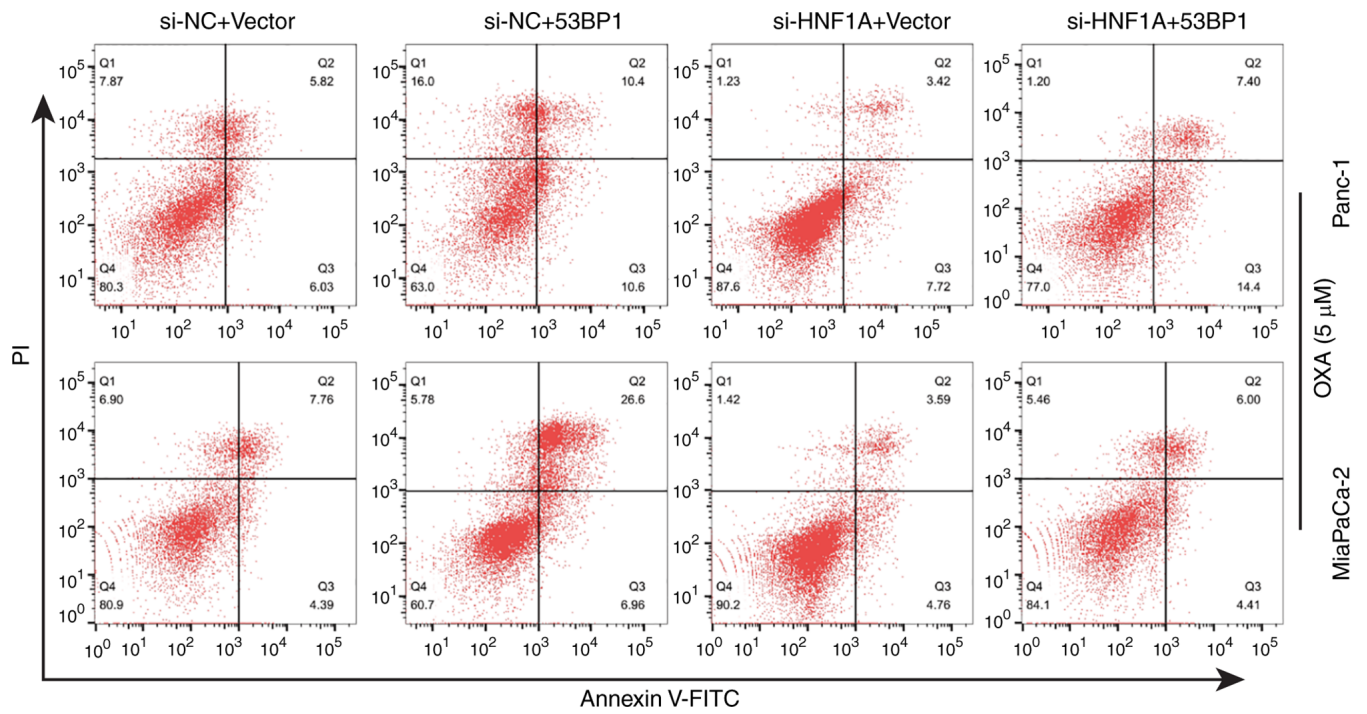

Figure S7. HR/NHEJ-mediated DNA repair in PDAC cell lines *in vitro*. (A) HR-mediated DNA repair efficiency was detected by the pDR-GFP reporter assay. (B) NHEJ-mediated DNA repair efficiency was detected by the pimeJ5-GFP reporter assay. HNF1A, hepatocyte nuclear factor 1 homeobox A; HR, homologous recombination; NC, negative control; NHEJ, nonhomologous end joining; si, small interfering.

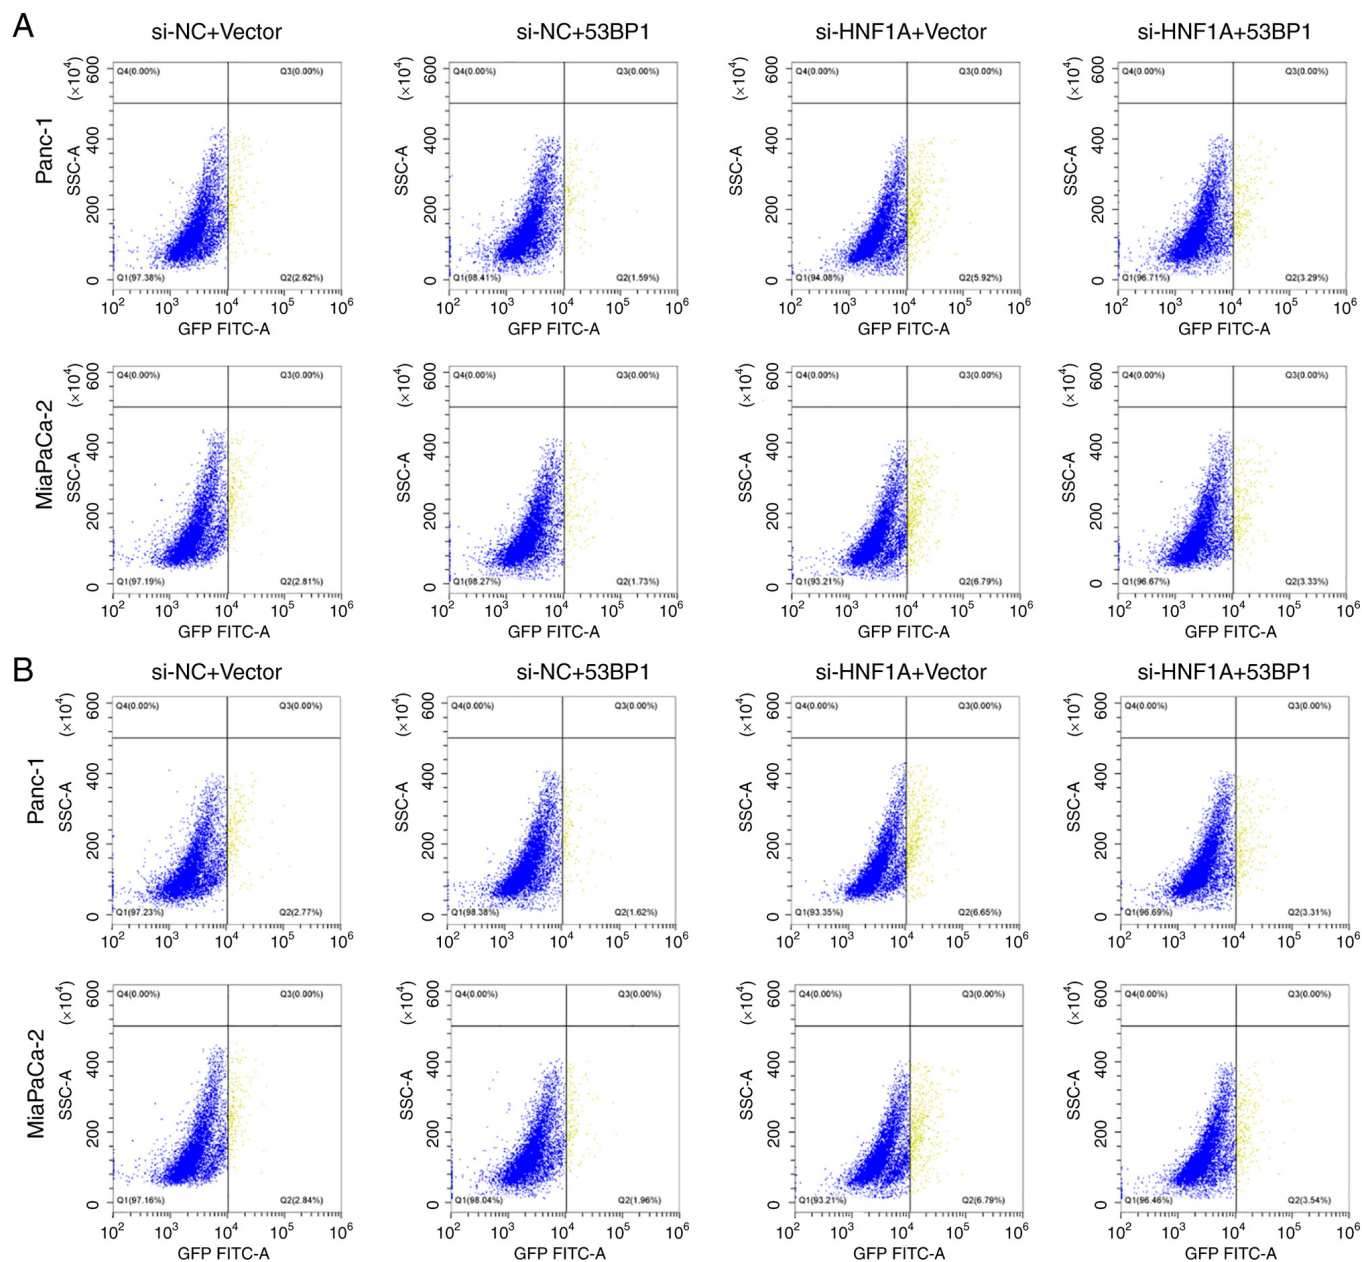

Supplement: Supplementary file 1 [file downloadSupplementary]
